# Supplementary material for: Executive Dysfunction in Older Adults Following Covid-19: Evidence From a Longitudinal Neuropsychological Study in Brazil
Source: Research Square preprint supplement (doi:10.21203/rs.3.rs-7186952/v1), 2025-08-08
Supplement: Supplementary file 1 [file 264433d982aba5faf100e046.docx]

EXECUTIVE DYSFUNCTION IN OLDER ADULTS FOLLOWING COVID-19: EVIDENCE FROM A LONGITUDINAL NEUROPSYCHOLOGICAL STUDY IN BRAZIL

**SUPPLEMENTARY MATERIAL**

| **Clinical characteristics related to COVID-19** | **COVID**  **(n = 57)**  **n (%)** |
| --- | --- |
| **ACUTE ILLNESS**  **Symptoms related to CNS involvement**  Ageusia  Anosmia  Headache  Acute mental confusion | 20 (35.1)  18 (31.6)  18 (31.6)  5 (8.8) |
| **Complications of acute illness**  Pneumonia  Hospitalization  Use of supplemental O2 | 30 (52.6)  13 (22.8)  13 (22.8) |
| **LONG COVID**  Cognitive Complaints*  Hair loss  Arthralgia  Fatigue  Myalgia  Insomnia  Asthenia  Depression  Anxiety  Imbalance  Dermatitis  Vision impairment  Erectile dysfunction | 29 (50.8)  9 (15.8)  6 (10.5)  4 (7)  2 (3.5)  2 (3.5)  2 (3.5)  1 (1.8)  1 (1.8)  1 (1.8)  1 (1.8)  1 (1.8)  1 (1.8) |
| **Self-related Post-COVID Cognitive complaints (PCCD)***  Memory  Attention  Concentration | 18 (31.6)  11 (19.3)  05 (8.8) |

**Table S1.** Clinical characteristics of acute COVID-19 in the COVID group and emerging symptoms after 6 months (long COVID).Values expressed as number of subjects (n) / frequencies (%). *Self-reported cognitive complaints. Abbreviations: COVID, individuals who have had COVID-19.

**Figure S1.** Linear mixed-effects models for variations over time in executive function tests between groups. Significant interactions are highlighted. Significant variations over time within groups (p-within) are shown in respective group lines. Significant differences between groups (p-between) according to each assessment time point are marked with an asterisk (*). For tests measuring performance time, lower values indicate better performance.

|  | **Executive Function Composite** | |
| --- | --- | --- |
| **Prognostic Variable** | Interaction test (*) | Effect of the prognostic variable (‡) |
| **Sociodemographics** |  |  |
| Male sex | 0.993 | **0.005** |
| Marital status: married x single/widower | **0.065** | 0.084 |
| Occupational status: active x retired | 0.614 | 0.371 |
| Income > 10k BRL/month | 0.547 | **0.001** |
| **Activities of Daily Living** |  |  |
| Physical Activity | 0.544 | 0.115 |
| Reading | 0.535 | 0.205 |
| Cognitive Stimulation | 0.521 | 0.166 |
| Travelling | **0.069** | **0.048** |
| **Comorbidities** |  |  |
| High blood pressure | 0.121 | 0.393 |
| Heart disease | 0.592 | **0.011** |
| Diabetes | 0.765 | 0.344 |
| Hypothyreoidism | 0.691 | 0.132 |
| Overweight | 0.831 | **0.043** |
| Vascular risk factors ≥ 3 | 0.207 | 0.316 |
| Hearing loss | 0.233 | 0.597 |
| Depression | 0.856 | 0.765 |
| Anxiety | **0.036** | 0.249 |
| Psychoactive drugs | 0.854 | 0.366 |
| Subjective cognitive complaint | 0.133 | 0.335 |
| Family history of dementia | 0.335 | 0.317 |
| Poor sleep quality (PSQI>5) | 0.481 | 0.404 |
| Insomnia | 0.804 | 0.277 |
| Sleep apnea | 0.755 | 0.201 |
| Diurnal naps | 0.708 | 0.319 |
| **Acute COVID-19 features** |  |  |
| Headache | 0.631 | 0.502 |
| Anosmia | 0.698 | 0.236 |
| Ageusia | 0.551 | 0.361 |
| Mental confusion | 0.121 | 0.494 |
| In-hospital care | 0.325 | 0.857 |
| Oxygen supplementation | 0.326 | 0.756 |
| **Post-COVID symptoms** |  |  |
| Post-COVID cognitive complaints | **0.005** | **0.032** |
| Arthralgia | 0.939 | 0.251 |
| Hair loss | 0.778 | **0.006** |
| Asthenia | 0.931 | 0.447 |
| Fatigue | 0.437 | 0.855 |

**Table S2.** Subgroup analysis: interactions between baseline variables and changes in executive function (as a composite measure) over time in COVID-19 patients. Mixed-effects models, adjusted for age and education, for differences between subgroups of COVID-19 patients according to the presence of each variable. (*) p-value reflects the difference in evolution over time between the two subgroups; (‡) The p-value reflects the numerical difference between the subgroups according to the prognostic variable. Significant results in bold (Interaction test p<0.10; Effect of the prognostic variable p <0.05).
